# Supplementary material
Source: publisher figshare collection journal article supplement (https://acs.figshare.com/ndownloader/files/5526854)
Supplement: Supplementary file 1 [file 5526854]

 

data_4j

 

_audit_creation_method            SHELXL-97

_chemical_name_systematic

;

 ?

;

_chemical_name_common             ?

_chemical_melting_point           ?

_chemical_formula_moiety          ?

_chemical_formula_sum

 'C24 H20 Br Cl N2 O2 S'

_chemical_formula_weight          515.84

 

loop_

 _atom_type_symbol

 _atom_type_description

 _atom_type_scat_dispersion_real

 _atom_type_scat_dispersion_imag

 _atom_type_scat_source

 'C'  'C'   0.0033   0.0016

 'International Tables Vol C Tables 4.2.6.8 and 6.1.1.4'

 'H'  'H'   0.0000   0.0000

 'International Tables Vol C Tables 4.2.6.8 and 6.1.1.4'

 'N'  'N'   0.0061   0.0033

 'International Tables Vol C Tables 4.2.6.8 and 6.1.1.4'

 'O'  'O'   0.0106   0.0060

 'International Tables Vol C Tables 4.2.6.8 and 6.1.1.4'

 'S'  'S'   0.1246   0.1234

 'International Tables Vol C Tables 4.2.6.8 and 6.1.1.4'

 'Cl'  'Cl'   0.1484   0.1585

 'International Tables Vol C Tables 4.2.6.8 and 6.1.1.4'

 'Br'  'Br'  -0.2901   2.4595

 'International Tables Vol C Tables 4.2.6.8 and 6.1.1.4'

 

_symmetry_cell_setting            ?

_symmetry_space_group_name_H-M    ?

 

loop_

 _symmetry_equiv_pos_as_xyz

 'x, y, z'

 '-x, y+1/2, -z+1/2'

 '-x, -y, -z'

 'x, -y-1/2, z-1/2'

 

_cell_length_a                    14.537(5)

_cell_length_b                    10.994(5)

_cell_length_c                    15.122(5)

_cell_angle_alpha                 90.000(5)

_cell_angle_beta                  113.089(5)

_cell_angle_gamma                 90.000(5)

_cell_volume                      2223.2(15)

_cell_formula_units_Z             4

_cell_measurement_temperature     293(2)

_cell_measurement_reflns_used     ?

_cell_measurement_theta_min       ?

_cell_measurement_theta_max       ?

 

_exptl_crystal_description        ?

_exptl_crystal_colour             ?

_exptl_crystal_size_max           ?

_exptl_crystal_size_mid           ?

_exptl_crystal_size_min           ?

_exptl_crystal_density_meas       ?

_exptl_crystal_density_diffrn     1.541

_exptl_crystal_density_method     'not measured'

_exptl_crystal_F_000              1048

_exptl_absorpt_coefficient_mu     2.088

_exptl_absorpt_correction_type    ?

_exptl_absorpt_correction_T_min   ?

_exptl_absorpt_correction_T_max   ?

_exptl_absorpt_process_details    ?

 

_exptl_special_details

;

 ?

;

 

_diffrn_ambient_temperature       293(2)

_diffrn_radiation_wavelength      0.71073

_diffrn_radiation_type            MoK\a

_diffrn_radiation_source          'fine-focus sealed tube'

_diffrn_radiation_monochromator   graphite

_diffrn_measurement_device_type   ?

_diffrn_measurement_method        ?

_diffrn_detector_area_resol_mean  ?

_diffrn_standards_number          ?

_diffrn_standards_interval_count  ?

_diffrn_standards_interval_time   ?

_diffrn_standards_decay_%         ?

_diffrn_reflns_number             21986

_diffrn_reflns_av_R_equivalents   0.0594

_diffrn_reflns_av_sigmaI/netI     0.0620

_diffrn_reflns_limit_h_min        -19

_diffrn_reflns_limit_h_max        19

_diffrn_reflns_limit_k_min        -14

_diffrn_reflns_limit_k_max        14

_diffrn_reflns_limit_l_min        -20

_diffrn_reflns_limit_l_max        19

_diffrn_reflns_theta_min          2.48

_diffrn_reflns_theta_max          28.29

_reflns_number_total              5498

_reflns_number_gt                 3918

_reflns_threshold_expression      >2sigma(I)

 

_computing_data_collection        ?

_computing_cell_refinement        ?

_computing_data_reduction         ?

_computing_structure_solution     ?

_computing_structure_refinement   'SHELXL-97 (Sheldrick, 1997)'

_computing_molecular_graphics     ?

_computing_publication_material   ?

 

_refine_special_details

;

 Refinement of F^2^ against ALL reflections.  The weighted R-factor wR and

 goodness of fit S are based on F^2^, conventional R-factors R are based

 on F, with F set to zero for negative F^2^. The threshold expression of

 F^2^ > 2sigma(F^2^) is used only for calculating R-factors(gt) etc. and is

 not relevant to the choice of reflections for refinement.  R-factors based

 on F^2^ are statistically about twice as large as those based on F, and R-

 factors based on ALL data will be even larger.

;

 

_refine_ls_structure_factor_coef  Fsqd

_refine_ls_matrix_type            full

_refine_ls_weighting_scheme       calc

_refine_ls_weighting_details

 'calc w=1/[\s^2^(Fo^2^)+(0.0575P)^2^+2.1069P] where P=(Fo^2^+2Fc^2^)/3'

_atom_sites_solution_primary      direct

_atom_sites_solution_secondary    difmap

_atom_sites_solution_hydrogens    geom

_refine_ls_hydrogen_treatment     mixed

_refine_ls_extinction_method      none

_refine_ls_extinction_coef        ?

_refine_ls_number_reflns          5498

_refine_ls_number_parameters      286

_refine_ls_number_restraints      0

_refine_ls_R_factor_all           0.0840

_refine_ls_R_factor_gt            0.0511

_refine_ls_wR_factor_ref          0.1242

_refine_ls_wR_factor_gt           0.1116

_refine_ls_goodness_of_fit_ref    1.018

_refine_ls_restrained_S_all       1.018

_refine_ls_shift/su_max           0.000

_refine_ls_shift/su_mean          0.000

 

loop_

 _atom_site_label

 _atom_site_type_symbol

 _atom_site_fract_x

 _atom_site_fract_y

 _atom_site_fract_z

 _atom_site_U_iso_or_equiv

 _atom_site_adp_type

 _atom_site_occupancy

 _atom_site_symmetry_multiplicity

 _atom_site_calc_flag

 _atom_site_refinement_flags

 _atom_site_disorder_assembly

 _atom_site_disorder_group

Br1 Br 0.58692(3) 0.42536(4) 0.41003(2) 0.03905(14) Uani 1 1 d . . .

S1 S 0.14233(5) 0.41735(6) -0.09731(5) 0.01662(16) Uani 1 1 d . . .

Cl1 Cl 0.20794(7) -0.28128(8) 0.18882(8) 0.0490(3) Uani 1 1 d . . .

O1 O 0.11022(16) 0.54036(19) -0.09778(14) 0.0222(5) Uani 1 1 d . . .

O2 O 0.12071(16) 0.35544(19) -0.18636(14) 0.0227(5) Uani 1 1 d . . .

N2 N 0.08499(17) 0.3390(2) -0.03931(16) 0.0168(5) Uani 1 1 d . . .

N1 N 0.08335(18) 0.1177(2) -0.08801(17) 0.0216(6) Uani 1 1 d . . .

C8 C 0.1007(2) 0.3841(3) 0.0598(2) 0.0171(6) Uani 1 1 d . . .

H8A H 0.0368 0.4016 0.0632 0.020 Uiso 1 1 calc R . .

H8B H 0.1401 0.4582 0.0740 0.020 Uiso 1 1 calc R . .

C19 C 0.2627(2) 0.3156(2) 0.20117(19) 0.0150(6) Uani 1 1 d . . .

C11 C 0.1054(2) 0.2120(3) -0.0247(2) 0.0174(6) Uani 1 1 d . . .

C6 C 0.3252(2) 0.3095(3) -0.0399(2) 0.0214(6) Uani 1 1 d . . .

H6 H 0.2932 0.2474 -0.0827 0.026 Uiso 1 1 calc R . .

C5 C 0.2715(2) 0.4094(3) -0.0290(2) 0.0163(6) Uani 1 1 d . . .

C9 C 0.1569(2) 0.2825(3) 0.1344(2) 0.0160(6) Uani 1 1 d . . .

C20 C 0.3451(2) 0.2475(3) 0.2053(2) 0.0183(6) Uani 1 1 d . . .

H20 H 0.3357 0.1797 0.1659 0.022 Uiso 1 1 calc R . .

C7 C 0.4267(2) 0.3046(3) 0.0141(2) 0.0268(7) Uani 1 1 d . . .

H7 H 0.4630 0.2383 0.0072 0.032 Uiso 1 1 calc R . .

C21 C 0.4420(2) 0.2799(3) 0.2680(2) 0.0221(7) Uani 1 1 d . . .

H21 H 0.4967 0.2340 0.2706 0.026 Uiso 1 1 calc R . .

C3 C 0.4205(2) 0.4942(3) 0.0877(2) 0.0266(7) Uani 1 1 d . . .

H3 H 0.4526 0.5563 0.1305 0.032 Uiso 1 1 calc R . .

C10 C 0.1450(2) 0.1766(2) 0.0680(2) 0.0156(6) Uani 1 1 d . . .

C4 C 0.3186(2) 0.5021(3) 0.0348(2) 0.0220(6) Uani 1 1 d . . .

H4 H 0.2824 0.5685 0.0418 0.026 Uiso 1 1 calc R . .

C17 C 0.1714(2) -0.1637(3) 0.1042(3) 0.0306(8) Uani 1 1 d . . .

C22 C 0.4551(2) 0.3806(3) 0.3255(2) 0.0235(7) Uani 1 1 d . . .

C2 C 0.4760(2) 0.3957(3) 0.0785(2) 0.0257(7) Uani 1 1 d . . .

C12 C 0.1500(2) 0.0465(3) 0.0670(2) 0.0200(6) Uani 1 1 d . . .

C14 C 0.0235(2) 0.1170(3) -0.1907(2) 0.0279(7) Uani 1 1 d . . .

H14A H -0.0102 0.1936 -0.2094 0.042 Uiso 1 1 calc R . .

H14B H -0.0250 0.0527 -0.2057 0.042 Uiso 1 1 calc R . .

H14C H 0.0662 0.1041 -0.2248 0.042 Uiso 1 1 calc R . .

C24 C 0.2797(2) 0.4162(3) 0.2611(2) 0.0202(6) Uani 1 1 d . . .

H24 H 0.2254 0.4624 0.2593 0.024 Uiso 1 1 calc R . .

C18 C 0.1809(2) -0.0443(3) 0.1367(2) 0.0243(7) Uani 1 1 d . . .

H18 H 0.2066 -0.0259 0.2020 0.029 Uiso 1 1 calc R . .

C1 C 0.5868(3) 0.3903(4) 0.1377(3) 0.0394(9) Uani 1 1 d . . .

H1A H 0.5982 0.3712 0.2031 0.059 Uiso 1 1 calc R . .

H1B H 0.6164 0.4677 0.1354 0.059 Uiso 1 1 calc R . .

H1C H 0.6165 0.3287 0.1124 0.059 Uiso 1 1 calc R . .

C16 C 0.1343(2) -0.1955(3) 0.0080(3) 0.0345(9) Uani 1 1 d . . .

H16 H 0.1301 -0.2770 -0.0095 0.041 Uiso 1 1 calc R . .

C13 C 0.1115(2) 0.0138(3) -0.0320(2) 0.0222(7) Uani 1 1 d . . .

C23 C 0.3748(2) 0.4499(3) 0.3232(2) 0.0241(7) Uani 1 1 d . . .

H23 H 0.3846 0.5177 0.3626 0.029 Uiso 1 1 calc R . .

C15 C 0.1036(2) -0.1072(3) -0.0617(3) 0.0301(8) Uani 1 1 d . . .

H15 H 0.0785 -0.1274 -0.1266 0.036 Uiso 1 1 calc R . .

H9 H 0.116(2) 0.272(3) 0.173(2) 0.015(7) Uiso 1 1 d . . .

 

loop_

 _atom_site_aniso_label

 _atom_site_aniso_U_11

 _atom_site_aniso_U_22

 _atom_site_aniso_U_33

 _atom_site_aniso_U_23

 _atom_site_aniso_U_13

 _atom_site_aniso_U_12

Br1 0.02632(19) 0.0611(3) 0.02428(19) -0.00342(17) 0.00402(14) -0.01879(16)

S1 0.0191(3) 0.0191(4) 0.0104(3) 0.0002(3) 0.0045(3) 0.0013(3)

Cl1 0.0415(5) 0.0155(4) 0.0699(7) 0.0083(4) 0.0002(5) -0.0003(3)

O1 0.0289(11) 0.0196(11) 0.0169(11) 0.0033(9) 0.0078(9) 0.0061(9)

O2 0.0281(12) 0.0266(12) 0.0116(10) -0.0024(9) 0.0057(8) -0.0007(9)

N2 0.0193(12) 0.0195(13) 0.0124(12) 0.0003(10) 0.0071(9) -0.0001(9)

N1 0.0224(13) 0.0234(14) 0.0176(13) -0.0080(11) 0.0062(10) -0.0057(10)

C8 0.0189(14) 0.0177(14) 0.0144(14) -0.0019(12) 0.0062(11) 0.0024(11)

C19 0.0234(14) 0.0121(14) 0.0098(13) 0.0029(11) 0.0066(11) -0.0017(11)

C11 0.0167(14) 0.0188(15) 0.0184(14) -0.0049(13) 0.0087(11) -0.0022(11)

C6 0.0271(16) 0.0224(16) 0.0158(15) -0.0014(13) 0.0094(12) 0.0006(12)

C5 0.0158(13) 0.0209(15) 0.0130(13) 0.0015(12) 0.0067(10) -0.0021(11)

C9 0.0210(14) 0.0142(14) 0.0138(14) 0.0004(12) 0.0079(11) 0.0013(11)

C20 0.0245(15) 0.0141(14) 0.0137(14) 0.0013(12) 0.0044(11) 0.0000(11)

C7 0.0276(17) 0.0351(19) 0.0209(16) 0.0029(15) 0.0131(13) 0.0085(13)

C21 0.0225(15) 0.0229(16) 0.0203(15) 0.0082(14) 0.0078(12) 0.0029(12)

C3 0.0299(17) 0.0292(18) 0.0183(16) -0.0026(14) 0.0068(13) -0.0116(13)

C10 0.0150(13) 0.0145(14) 0.0185(14) -0.0035(12) 0.0077(11) -0.0013(10)

C4 0.0259(16) 0.0196(16) 0.0205(15) -0.0012(13) 0.0090(12) -0.0032(12)

C17 0.0217(16) 0.0149(16) 0.051(2) 0.0021(16) 0.0092(15) 0.0014(12)

C22 0.0197(15) 0.0329(18) 0.0142(14) 0.0044(14) 0.0027(11) -0.0078(13)

C2 0.0218(16) 0.040(2) 0.0163(15) 0.0066(14) 0.0090(12) -0.0022(13)

C12 0.0131(13) 0.0174(15) 0.0303(17) -0.0047(13) 0.0093(12) -0.0025(11)

C14 0.0308(18) 0.0355(19) 0.0188(16) -0.0127(15) 0.0113(13) -0.0142(14)

C24 0.0266(16) 0.0178(15) 0.0171(15) 0.0001(13) 0.0095(12) 0.0003(12)

C18 0.0159(14) 0.0177(15) 0.0356(18) 0.0022(14) 0.0061(13) 0.0001(11)

C1 0.0241(18) 0.066(3) 0.0254(18) 0.0091(18) 0.0064(14) -0.0022(17)

C16 0.0225(17) 0.0179(17) 0.060(3) -0.0142(17) 0.0125(16) -0.0042(13)

C13 0.0128(14) 0.0242(16) 0.0291(17) -0.0077(14) 0.0077(12) -0.0044(11)

C23 0.0347(18) 0.0213(16) 0.0168(15) -0.0045(13) 0.0105(13) -0.0110(13)

C15 0.0250(17) 0.0255(18) 0.041(2) -0.0186(16) 0.0136(15) -0.0087(13)

 

_geom_special_details

;

 All esds (except the esd in the dihedral angle between two l.s. planes)

 are estimated using the full covariance matrix.  The cell esds are taken

 into account individually in the estimation of esds in distances, angles

 and torsion angles; correlations between esds in cell parameters are only

 used when they are defined by crystal symmetry.  An approximate (isotropic)

 treatment of cell esds is used for estimating esds involving l.s. planes.

;

 

loop_

 _geom_bond_atom_site_label_1

 _geom_bond_atom_site_label_2

 _geom_bond_distance

 _geom_bond_site_symmetry_2

 _geom_bond_publ_flag

Br1 C22 1.905(3) . ?

S1 O2 1.429(2) . ?

S1 O1 1.430(2) . ?

S1 N2 1.667(2) . ?

S1 C5 1.754(3) . ?

Cl1 C17 1.749(4) . ?

N2 C11 1.426(4) . ?

N2 C8 1.509(4) . ?

N1 C11 1.362(4) . ?

N1 C13 1.385(4) . ?

N1 C14 1.452(4) . ?

C8 C9 1.569(4) . ?

C19 C24 1.390(4) . ?

C19 C20 1.393(4) . ?

C19 C9 1.516(4) . ?

C11 C10 1.347(4) . ?

C6 C7 1.380(4) . ?

C6 C5 1.394(4) . ?

C5 C4 1.386(4) . ?

C9 C10 1.503(4) . ?

C20 C21 1.401(4) . ?

C7 C2 1.384(5) . ?

C21 C22 1.374(5) . ?

C3 C4 1.383(4) . ?

C3 C2 1.390(5) . ?

C10 C12 1.433(4) . ?

C17 C16 1.383(5) . ?

C17 C18 1.390(4) . ?

C22 C23 1.383(5) . ?

C2 C1 1.506(4) . ?

C12 C18 1.392(4) . ?

C12 C13 1.423(4) . ?

C24 C23 1.383(4) . ?

C16 C15 1.372(5) . ?

C13 C15 1.395(4) . ?

 

loop_

 _geom_angle_atom_site_label_1

 _geom_angle_atom_site_label_2

 _geom_angle_atom_site_label_3

 _geom_angle

 _geom_angle_site_symmetry_1

 _geom_angle_site_symmetry_3

 _geom_angle_publ_flag

O2 S1 O1 119.67(13) . . ?

O2 S1 N2 106.20(13) . . ?

O1 S1 N2 105.18(12) . . ?

O2 S1 C5 108.67(13) . . ?

O1 S1 C5 108.77(13) . . ?

N2 S1 C5 107.75(13) . . ?

C11 N2 C8 103.1(2) . . ?

C11 N2 S1 118.10(19) . . ?

C8 N2 S1 116.13(19) . . ?

C11 N1 C13 105.4(2) . . ?

C11 N1 C14 129.3(3) . . ?

C13 N1 C14 124.0(3) . . ?

N2 C8 C9 108.3(2) . . ?

C24 C19 C20 118.0(3) . . ?

C24 C19 C9 119.9(3) . . ?

C20 C19 C9 122.1(2) . . ?

C10 C11 N1 113.4(3) . . ?

C10 C11 N2 115.0(2) . . ?

N1 C11 N2 131.2(3) . . ?

C7 C6 C5 118.6(3) . . ?

C4 C5 C6 121.0(3) . . ?

C4 C5 S1 119.7(2) . . ?

C6 C5 S1 119.3(2) . . ?

C10 C9 C19 116.9(2) . . ?

C10 C9 C8 100.4(2) . . ?

C19 C9 C8 114.5(2) . . ?

C19 C20 C21 120.8(3) . . ?

C6 C7 C2 121.8(3) . . ?

C22 C21 C20 119.1(3) . . ?

C4 C3 C2 121.5(3) . . ?

C11 C10 C12 106.3(3) . . ?

C11 C10 C9 111.2(2) . . ?

C12 C10 C9 142.0(3) . . ?

C3 C4 C5 118.8(3) . . ?

C16 C17 C18 123.7(3) . . ?

C16 C17 Cl1 117.7(2) . . ?

C18 C17 Cl1 118.7(3) . . ?

C21 C22 C23 121.5(3) . . ?

C21 C22 Br1 119.1(2) . . ?

C23 C22 Br1 119.5(2) . . ?

C7 C2 C3 118.3(3) . . ?

C7 C2 C1 121.8(3) . . ?

C3 C2 C1 119.9(3) . . ?

C18 C12 C13 119.5(3) . . ?

C18 C12 C10 135.3(3) . . ?

C13 C12 C10 105.2(3) . . ?

C23 C24 C19 122.0(3) . . ?

C17 C18 C12 116.8(3) . . ?

C15 C16 C17 120.3(3) . . ?

N1 C13 C15 128.4(3) . . ?

N1 C13 C12 109.6(3) . . ?

C15 C13 C12 121.9(3) . . ?

C22 C23 C24 118.6(3) . . ?

C16 C15 C13 117.7(3) . . ?

 

_diffrn_measured_fraction_theta_max    0.995

_diffrn_reflns_theta_full              28.29

_diffrn_measured_fraction_theta_full   0.995

_refine_diff_density_max    0.956

_refine_diff_density_min   -0.940

_refine_diff_density_rms    0.109
